# Supplementary material
Source: publisher figshare collection journal article supplement (https://gsajournals.figshare.com/ndownloader/files/25215458)

**Table S1. Oligonucleotides used in the study.**

|                           |                                                                           |
|---------------------------|---------------------------------------------------------------------------|
| NCL-For                   | 5' CGCGGATCCATGGTGAAGCTCGCGAAGGCAG 3'                                     |
| NCL-1XHA<br>Rev           | 5'CCGCTCGAGCTAAGCGTAATCTGGAACATCGTATGGGTATTCAAAC TTCGTCT<br>TCTTTCC 3'    |
| NCL $\Delta$ RGG-<br>1XHA | 5'CCGCTCGAGCTAAGCGTAATCTGGAACATCGTATGGGTATTCACCCTTAGGTT<br>TGGCCCAGTCC 3' |
| Primers for ddPCR         |                                                                           |
| ARS306 For                | 5' CATACTAACGAGCGAGCAC 3'                                                 |
| ARS306 Rev                | 5' CGAACTATTGGGATTGGGGG 3'                                                |
| KanMX For                 | 5' CGGCAAAACAGCATTCCAG 3'                                                 |
| KanMX Rev                 | 5' CGTCATCAAATCACTCGCATC 3'                                               |
| STE50 For                 | 5' CTACAAACCAATCTCACCCATC 3'                                              |
| STE50 Rev                 | 5' CCCCATAGCAAATGACCAAG 3'                                                |

**Table S2. The strains and recombination rates shown in Figure 1.**

| Relevant Genotype                           | Recombination rate x 10 <sup>-8</sup> (95% C.I.) |                       |
|---------------------------------------------|--------------------------------------------------|-----------------------|
|                                             | <i>GTOP</i>                                      | <i>GBTM</i>           |
| WT                                          | 20.3**<br>(18.2-24.4)                            | 12.5**<br>(9.3-15.6)  |
| <i>top1</i> Δ                               | 82.0<br>(68.2-127)                               | 8.5<br>(7.5-13.3)     |
| <i>nsr1</i> Δ                               | 16.7<br>(13.8-20.1)                              | 8.52<br>(7.4-11.2)    |
| <i>top1</i> Δ <i>nsr1</i> Δ                 | 25.8<br>(23.9-35.6)                              | 6.11<br>(5.54-9.41)   |
| <i>top1</i> -Y727F                          | 669**<br>(393-998)                               | 16.3*<br>(13.5-18.6)  |
| <i>top1</i> -Y727F <i>nsr1</i> Δ            | 161**<br>(111-250.2)                             | 9.96**<br>(8.95-12.5) |
| <i>rnh1</i> Δ <i>rnh201</i> Δ               | 287**<br>(255-313)                               | 86.9**<br>(66.9-97.7) |
| <i>rnh1</i> Δ <i>rnh201</i> Δ <i>nsr1</i> Δ | 298<br>(269-322)                                 | 109<br>(89.4-157)     |

For all fluctuation analyses, the number of cultures used are 36 unless indicated (\*12 and \*\* 24). 95% C.I. – 95% confidence intervals were determined as described in the Materials and Methods.

**Table S3. The strains and recombination rates shown in Figure S2.**

| Relevant Genotype           | Recombination rate x 10 <sup>-8</sup> (95% C.I.) |                     |
|-----------------------------|--------------------------------------------------|---------------------|
|                             | <i>GTOP</i>                                      | <i>GBTM</i>         |
| WT                          | 2.94<br>(2.58-3.4)                               | 2.7<br>(2.51-3.02)  |
| <i>top1</i> Δ               | 6.17<br>(5.38-7.39)                              | 3.61<br>(3.19-4.06) |
| <i>nsr1</i> Δ               | 2.8<br>(2.35-3.19)                               | 1.85<br>(1.56-2.71) |
| <i>top1</i> Δ <i>nsr1</i> Δ | 3.04<br>(1.64-4.59)                              | 2.25<br>(1.31-3.58) |

For all fluctuation analyses, the number of cultures used are 24. 95% C.I. – 95% confidence intervals were determined as described in the Materials and Methods.

**Table S4. The strains and recombination rates shown in Figure 2.**

| Relevant Genotype       | Recombination rate x 10 <sup>-8</sup> (95% C.I.) |                        |                        |                       |
|-------------------------|--------------------------------------------------|------------------------|------------------------|-----------------------|
|                         | WT                                               | <i>top1Δ</i>           | <i>nsr1Δ</i>           | <i>top1Δnsr1Δ</i>     |
| <b><i>Sμ-GTOP</i></b>   | 0.3<br>(0.261-0.533)                             | 7.60<br>(3.82-22.7)    | 0.332<br>(0.332-0.515) | 1.26<br>(0.433-1.95)  |
| <b><i>Sμ-GBTM</i></b>   | 0.295<br>(0.257-0.463)                           | 0.465<br>(0.258-0.811) | 0.445<br>(0.346-1.22)  | 0.561<br>(0.275-1.24) |
| <b><i>TCF3-GTOP</i></b> | 0.514<br>(0.291-0.614)                           | 8.52<br>(6.7-11.7)     | 0.463<br>(0.299-1.12)  | 0.959<br>(0.569-1.43) |
| <b><i>TCF3-GBTM</i></b> | 0.563<br>(0.336-0.762)                           | 2.54<br>(1.02-3.73)    | 0.316<br>(0.316-0.568) | 0.593<br>(0.33-1.03)  |

For all fluctuation analyses, the number of cultures used are 24. 95% C.I. – 95% confidence intervals were determined as described in the Materials and Methods.

**Table S5. The strains and recombination rates shown in Figure 3B.**

| Relevant Genotype  | Plasmid                            | Recombination rate x 10 <sup>-8</sup> (95% C.I.) |                      |
|--------------------|------------------------------------|--------------------------------------------------|----------------------|
|                    |                                    | <b><i>GTOP</i>***</b>                            | <b><i>GBTM</i>**</b> |
| <i>WT</i>          | Vec ( <i>CEN-URA3</i> )            | 47.1<br>(45-50.8)                                | 17<br>(12.9-24.2)    |
|                    | pNSR1-Nsr1 ( <i>CEN-URA3</i> )     | 57.5<br>(48-79)                                  | 26.7<br>(11.2-50.8)  |
|                    | pNSR1-Nsr1ΔRGG ( <i>CEN-URA3</i> ) | 35.2<br>(26 -43.5)                               | 19.1<br>(16.5-21.8)  |
|                    |                                    |                                                  |                      |
| <i>top1Δ</i>       | Vec ( <i>CEN-URA3</i> )            | 270<br>(210-328)                                 | 35.9<br>(23-61.3)    |
|                    | pNSR1-Nsr1 ( <i>CEN-URA3</i> )     | 1170<br>(426-2190)                               | 67.8<br>(41-106)     |
|                    | pNSr1-Nsr1ΔRGG ( <i>CEN-URA3</i> ) | 125<br>(60-273)                                  | 29.6<br>(20.9-43.5)  |
|                    |                                    |                                                  |                      |
| <i>top1Δ nsr1Δ</i> | Vec ( <i>CEN-URA3</i> )            | 49.7<br>(45.5-69.3)                              | 26.9<br>(19.8-36.6)  |
|                    | pNSR1-Nsr1 ( <i>CEN-URA3</i> )     | 424<br>(189-717)                                 | 21.7<br>(20.3-23.2)  |
|                    | pNSR1-Nsr1ΔRGG ( <i>CEN-URA3</i> ) | 37.4<br>(32.3-42)                                | 22.5<br>( 22.7-26)   |
|                    |                                    |                                                  |                      |

Number of cultures used in the fluctuation analyses are \*\*24 and \*\*\*36 as indicated. 95% C.I. – 95% confidence intervals were determined as described in the Materials and Methods.

**Table S6. The strains and recombination rates shown in Figure 3C.**

| <b>Relevant Genotype</b> | <b>Plasmid</b>                 | <b><i>GTOP</i></b>     |
|--------------------------|--------------------------------|------------------------|
| <i>top1Δ nsr1Δ</i>       | Vec ( <i>2μ-URA3</i> )         | 159<br>(124-176)       |
|                          | pADH1-NTerm ( <i>2μ-URA3</i> ) | 168<br>(134-206)       |
|                          | pADH1-CTerm ( <i>2μ-URA3</i> ) | 813<br>(561-992)       |
|                          | pADH1-Nsr1 ( <i>2μ-URA3</i> )  | 2,030<br>(1,640-2,600) |
|                          |                                |                        |
| <i>top1Δ</i>             | Vec ( <i>2μ-URA3</i> )         | 266<br>(138-471)       |
|                          | pADH1-NTerm ( <i>2μ-URA3</i> ) | 220<br>(192-299)       |
|                          | pADH1-CTerm ( <i>2μ-URA3</i> ) | 496<br>(312-819)       |
|                          |                                |                        |

For all fluctuation analyses, the number of cultures used are 36. as indicated 95% C.I. – 95% confidence intervals were determined as described in the Materials and Methods.

**Table S7. The strains and recombination rates shown in Figure 4.**

| Relevant Genotype  | Plasmid                           | Recombination rate x 10 <sup>-8</sup> (95% C.I.) |                           |
|--------------------|-----------------------------------|--------------------------------------------------|---------------------------|
|                    |                                   | <i>GTOP</i> <sup>***</sup>                       | <i>GBTM</i> <sup>**</sup> |
| <i>top1Δ nsr1Δ</i> | Vec ( <i>CEN-URA3</i> )           | 64.6<br>(24-93.8)                                | 25.8<br>(22.6-33.8)       |
|                    | pNSR1-NCL ( <i>CEN-URA3</i> )     | 125<br>(117-184)                                 | 37<br>(29-43.3)           |
|                    | pNSR1-NCLΔRGG ( <i>CEN-URA3</i> ) | 89.3<br>(70.5-104.6)                             | 30.6<br>(20.8-36.1)       |
|                    |                                   |                                                  |                           |
| <i>top1Δ</i>       | Vec ( <i>CEN-URA3</i> )           | 176<br>(135.3-226)                               | 44<br>(33.3-64)           |
|                    | pNSR1-NCL( <i>CEN-URA3</i> )      | 381<br>(347-427)                                 | 106<br>(62-211)           |
|                    | pNSR1-NCLΔRGG ( <i>CEN-URA3</i> ) | 183<br>(149-276)                                 | 40.2<br>(14.3--49.9)      |
|                    |                                   |                                                  |                           |

Number of cultures used in the fluctuation analyses are \*\*24 and \*\*\*36 as indicated. 95% C.I. – 95% confidence intervals were determined as described in the Materials and Methods.

**Table S8. The strains and recombination rates shown in Figure S3D.**

| <b>Relevant Genotype</b>               | Recombination rate x 10 <sup>-8</sup> (95% C.I.) |                     |
|----------------------------------------|--------------------------------------------------|---------------------|
|                                        | <b><i>GTOP</i></b>                               | <b><i>GBTM</i></b>  |
| <i>top1</i> Δ                          | 82.0<br>(68.2-127)                               | 8.5<br>(7.5-13.3)   |
| <i>top1</i> Δ <i>nsr1</i> Δ            | 25.8<br>(23.9-35.6)                              | 6.11<br>(5.54-9.41) |
| <i>top1</i> Δ <i>nsr1</i> Δ <i>RGG</i> | 28.7<br>(27.2-35.1)                              | 8.7<br>(7.3-10.2)   |

For all fluctuation analyses, the number of cultures used are 36. 95% C.I. – 95% confidence intervals were determined as described in the Materials and Methods.

## **SUPPLEMENTAL METHODS**

### **DNA-Dynabeads Affinity Purification of Proteins**

The DNA-Dynabeads affinity purification of proteins was carried out according to the previously described protocol (GAO *et al.* 2015) with some modifications. For DNA-conjugated Dynabeads preparation, biotinylated oligonucleotides S<sub>μ</sub>G, S<sub>μ</sub>G-M1 and S<sub>μ</sub>G-M2 (Sigma) were incubated at 60°C overnight in the presence of 10 mM Tris pH 7.5 and 100 mM KCl and then conjugated to Streptavidin-Coupled M-280 Dynabeads® (Life Technologies) as per the manufacturer's instructions. Yeast cells from indicated backgrounds were used to prepare whole cell extracts by glass bead-mediated cell disruption. The oligo-conjugated beads were incubated with the yeast extract at 4 °C. After washing, proteins were eluted by boiling in 1XSDS-PAGE loading buffer followed by immunoblotting analysis using anti-FLAG antibody (Sigma; Cat# A8592).

### **Cell synchronization and Flow cytometry to measure DNA content.**

Cell synchronization and sample collection was carried out as described in the Materials and Methods. For flow cytometry, yeast cells were fixed overnight in ice-cold 70% ethanol at 4°C and then re-suspended in 500μl of 50 mM sodium citrate (pH 7.2) containing RNase A and incubated for 2 hours at 37°C, followed by incubation with 50μl of 20 mg/ml Proteinase K. at 50°C for 1 - 2 hours. Cells were stained with SYTOX Green dye (4 μM in 50mM sodium citrate, pH 7.2; Thermo Scientific) for at least one hour and then analyzed using the BD FACS ARIA II SORP and FlowJo software (FlowJo, LLC).

## REFERENCES

Gao, J., B. L. Zybaylov, A. K. Byrd, W. C. Griffin, S. Chib *et al.*, 2015 Yeast transcription co-activator Sub1 and its human homolog PC4 preferentially bind to G-quadruplex DNA. *Chem Commun (Camb)* 51: 7242-7244.

### Supplementary Figure Legends

**Figure S1.** The design of *pTET-lys2-GTOP* reporter. **(A)** The sequence of guanine-rich strand of the mouse S $\mu$ G fragment inserted into the yeast genome for the construction of *pTET-lys2-GTOP* reporter is shown. The runs of 4 consecutive guanines are underlined and in bold. **(B)** The strand orientations of the S $\mu$ G sequence in the *pTET-lys2-GTOP* and *-GBTM* cassettes relative to transcription are diagramed. In *GTOP* orientation, the strand containing guanine runs shown in **(A)** are on the non-transcribed strand favoring G4 DNA formation. In *GBTM* orientation, the same guanine runs are on the transcribed strand favoring base-pairing with the nascent RNA (red line). **(C)** A schematic drawing of the reporter used for the gross chromosomal rearrangement (GCR) analysis embedded in the left arm of chromosome 5, centromere-proximal to *CAN1* locus. *URA3* gene integrated telomere-proximal to *CAN1* locus is indicated.

**Figure S2.** Rates of recombination of the indicated strains under low transcription conditions. Error bars indicate 95% confidence intervals. Two rates are considered statistically different when the confidence intervals do not overlap. The rates, numbers of cultures used in fluctuation analyses, and 95% confidence intervals are listed in Table S3.



**Figure S3.** Effect of *nsr1* $\Delta$  deletion on cell growth and rRNA processing. **(A)** Overnight grown cells from indicated strains were grown to log phase in liquid YEPD media at 30 °C. Cells were then diluted  $\sim 1 \times 10^6$  cells/ml in fresh medium. Cell growth at 30 °C was monitored by measuring OD<sub>600</sub>. The data represent averages of eight cultures with the error bars indicating the standard deviation. **(B)** Total RNAs were isolated from the depicted strains followed by northern blot probing with labeled oligos. The *SCR1* RNA serves as a loading control. **(C)** Ratio of 20S/35S in indicated strains normalized to the *WT* ratio. **(D)** Rates of recombination of *top1* $\Delta$  strains with genomic *NSR1*, *nsr1* $\Delta$ RGG, or *nsr1* $\Delta$  allele. Error bars indicate 95% confidence intervals. Two rates are considered statistically different when the confidence intervals do not overlap. The rates, numbers of cultures used in fluctuation analyses, and 95% confidence intervals are listed in Table S8.

**Figure S4. Nsr1 and Nsr1 $\Delta$ RGG binding to G4 DNA *in vitro*.**

**(A)** Sequence of the oligos used in pulldown assays. **(B)** For pull-down assays, the indicated, biotin-conjugated oligos were incubated with total yeast lysate from *top1* $\Delta$  cells expressing the C-terminal 3XFLAG tagged version of full length Nsr1 or Nsr1 $\Delta$ RGG.  $\alpha$ FLAG antibody was used to detect the respective proteins. **(C)** Quantification of % IP to input from (B); N=3.

**Figure S5. (A - D)** Flow cytometry analysis of the indicated strains containing the *pTET-lys2-GTOP* or *-GBTM* cassette. Cells were taken at the indicated timepoints (t = minutes after  $\alpha$ -factor release) and stained with SYTOX green dye to measure DNA content.

**Figure S6.** *GBTM* strains analyzed by ddPCR. Normalized copy number of **(A)** ARS306 **(B)** KanMX and **(C)** Ste50 loci. See Figure 6 legend for more detail.

(A) *S* $\mu$ G sequence

|                           |                          |                           |                          |                          |                           |
|---------------------------|--------------------------|---------------------------|--------------------------|--------------------------|---------------------------|
| TC                        | GAGCTGAGCT               | GAGCTGGGTG                | AGCTGAGCTG               | AGCTGAGCTG               | GGTGAGCTGA                |
| GCTGAGCTGA                | GCTGAGCTGG               | <b><u>GTGAGCTGAG</u></b>  | <b><u>CTGAGCTGAG</u></b> | <b><u>CTGAGCTGAG</u></b> | <b><u>CTGAGCTGGG</u></b>  |
| <b><u>GTGAGCTGGG</u></b>  | <b><u>CTGAGCTGAG</u></b> | <b><u>CTGAGCTGGG</u></b>  | <b><u>GTGAGCTGAG</u></b> | <b><u>CTGAGCTGAG</u></b> | <b><u>CTGAGCTGGG</u></b>  |
| <b><u>GTGAGCTGGG</u></b>  | <b><u>CTGAGCTGGG</u></b> | <b><u>GTGAGCTGGG</u></b>  | <b><u>CTGAGCTGAG</u></b> | <b><u>CTGGGGTGAG</u></b> | <b><u>CTGAGCTGAG</u></b>  |
| <b><u>CTGAGCTGAG</u></b>  | <b><u>CTGGGGTGAG</u></b> | <b><u>CTGAGCTGAG</u></b>  | <b><u>CTGAGCTGGG</u></b> | <b><u>GTGAGCTGAG</u></b> | CTGGGCT <b><u>GAG</u></b> |
| <b><u>CTGAGCTGGG</u></b>  | <b><u>GTGAGCTGAG</u></b> | <b><u>CTGAGCTGAG</u></b>  | <b><u>CTGAGCTGGG</u></b> | <b><u>GTGAGCTGAG</u></b> | <b><u>CTGAGCTGAG</u></b>  |
| <b><u>CTGGGGTGAG</u></b>  | <b><u>CTGAGCTGGG</u></b> | <b><u>GTGAGCTGAG</u></b>  | <b><u>CTGAGCTGGG</u></b> | <b><u>GTGAGCTGAG</u></b> | <b><u>CTGAGCTGAG</u></b>  |
| <b><u>CTGGGGTGAG</u></b>  | <b><u>CTGAGCTGGG</u></b> | <b><u>GTGAGCTGAG</u></b>  | <b><u>CTGAGCTGGG</u></b> | <b><u>GTGAGCTGAG</u></b> | <b><u>CTGAGCTGGG</u></b>  |
| <b><u>GTGAGCTGAG</u></b>  | <b><u>CTGAGCTGGG</u></b> | <b><u>GTGAGCTGAG</u></b>  | <b><u>CTGAGCTGGG</u></b> | <b><u>GTGAGCTGAG</u></b> | CTAGGGTGAG                |
| CTGGGCTGGG                | TGAGCTGGAG               | TGAGCTGAGC                | TGAGGTGAAC               | TGGGGTGAGC               | CGGATGTTTT                |
| GAGTT <b><u>GAGCT</u></b> | <b><u>GGGGTAAGAT</u></b> | GAGCTGAAC                 | GGGGTAAGAT               | GGGATGAGCT               | GTGGTGAGGG                |
| GAGCTGGATT                | GAACTGAGCT               | GTGT <b><u>GAGCTG</u></b> | <b><u>AGCTGGGGTC</u></b> | AGCTGAGCAA               | GAGTGAGTAG                |
| AGCTGGCTGG                | CCAAGAACCA               | AGAATCAATT                | AGGCTAAGTG               | AGCCAGATTG               | CGCTGGGA                  |

Figure S1

(B) *GTOP* vs. *GBTM*

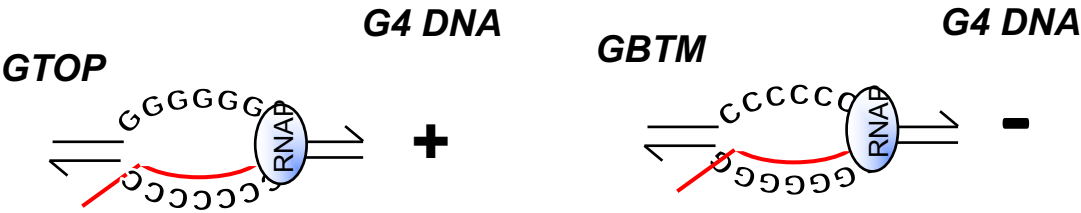

(C) GCR reporter configuration

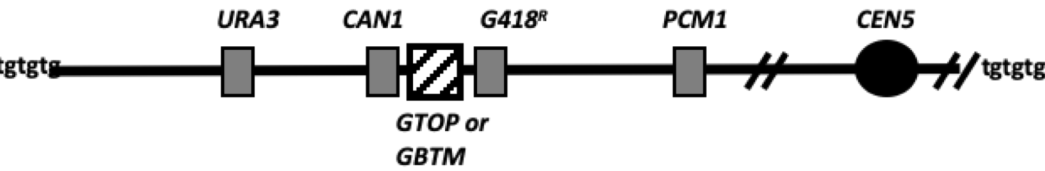

Figure S2

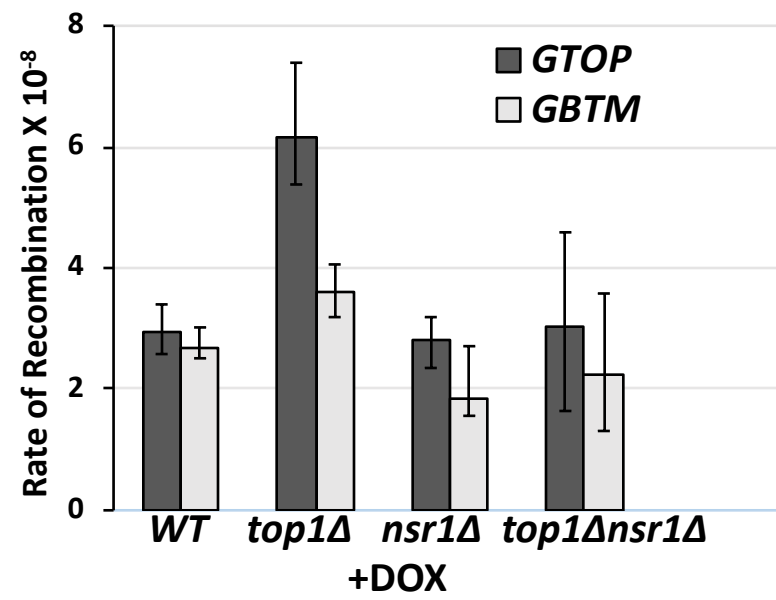

Figure S3.

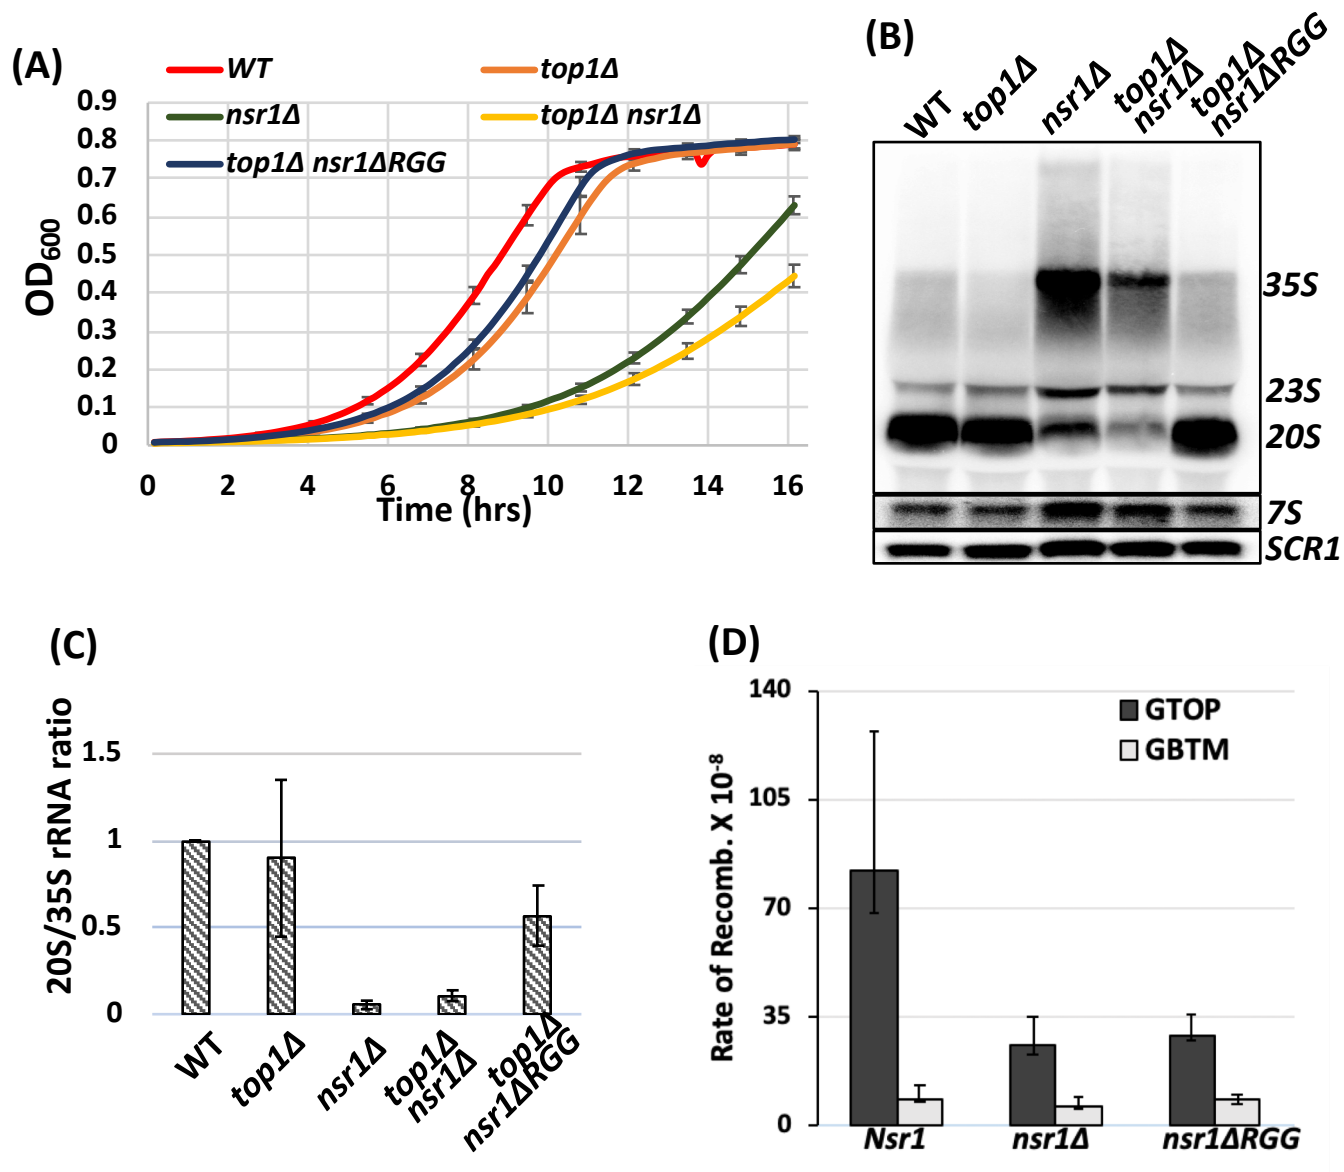

Figure S4.

(A)

**S $\mu$ G** : GAGCTGGGGTGAGCTGGGCTGAGCTGGGGTGAGCTGGGCTGAGCT  
**S $\mu$ G-M1**: GAGCTGaGGTGAGCTGGGCTGAGCTGaGGTGAGCTGGGCTGAGCT  
**S $\mu$ G-M2**: GAGCTGGGGTGAGCTGaGCTGAGCTGGGGTGAGCTGaGCTGAGCT

(B)

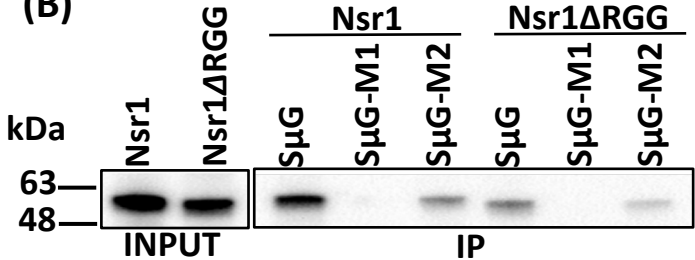

(C)

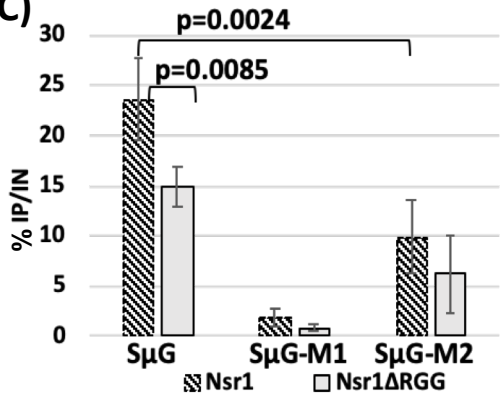

**Figure S5.**

**(A)** *top1Δ Nsr1 (GTOP)*

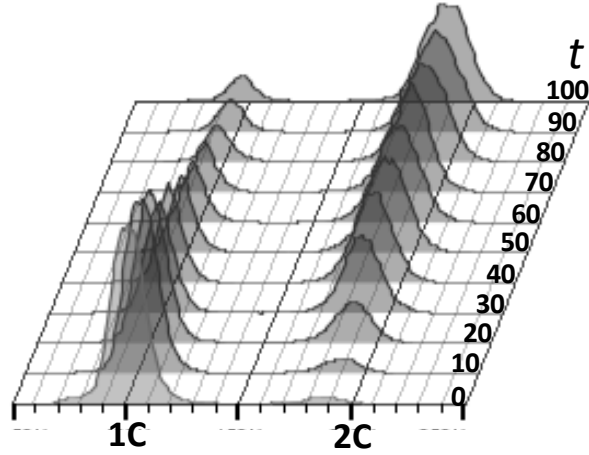

**(B)** *top1Δ nsr1-ΔRGG (GTOP)*

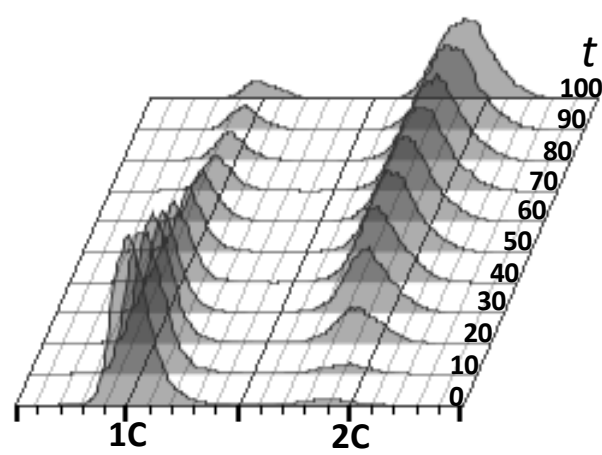

**(C)** *top1Δ Nsr1 (GBTM)*

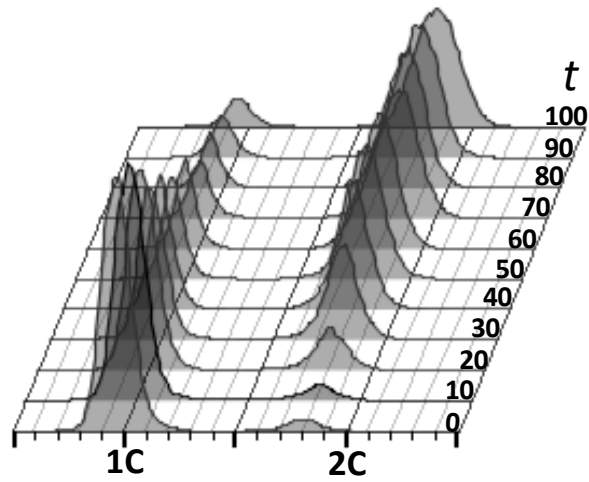

**(D)** *top1Δ nsr1-ΔRGG (GBTM)*

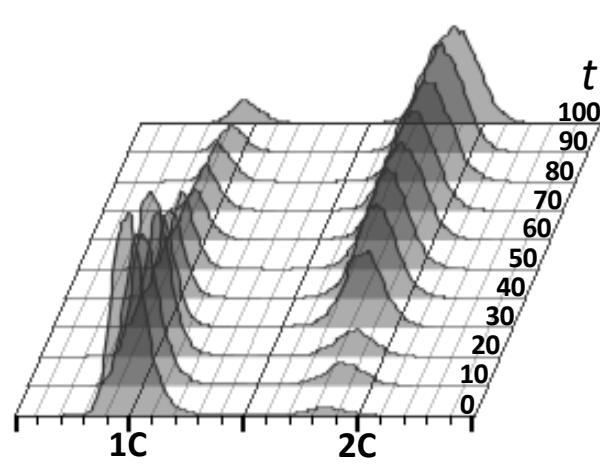

Figure S6.

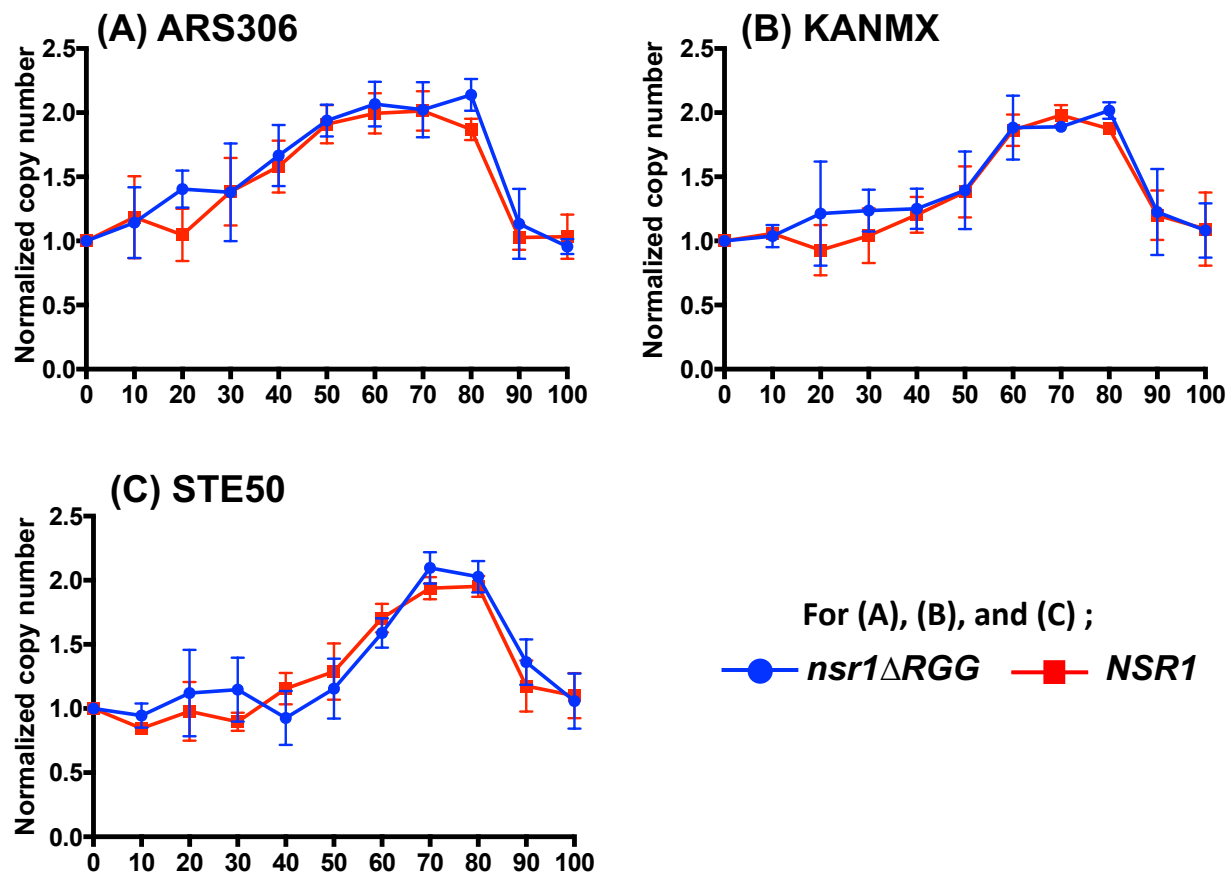

Supplement: Supplementary file 1 [file 25215458]
